# Supplementary material for: Identification of Epstein-Barr Virus in the Human Placenta and Its Pathologic Characteristics
Source: PubMed Central journal article supplement — J Korean Med Sci. 2017 Oct 18;32(12):1959–66. doi: 10.3346/jkms.2017.32.12.1959 (PMC5680494; doi:10.3346/jkms.2017.32.12.1959), 2017-10-18
Supplement: jkms-32-1959-s001.pdf [file jkms-32-1959-s001.pdf]

**Supplementary Table 1.** Clinical information of the 60 non-pregnant patients whose endometrial tissues were used as control for EBV staining

| Parameters         | No. of patients  |
|--------------------|------------------|
| Sex                |                  |
| Female             | 60               |
| Male               | 0                |
| Age, yr            |                  |
| Mean $\pm$ SD      | 38.83 $\pm$ 4.22 |
| Range              | 25–45            |
| Phase              |                  |
| Proliferative      | 27               |
| Secretory          | 33               |
| Underlying disease |                  |
| Benign             | 46               |
| Malignant          | 14               |

EBV = Epstein-Barr virus, SD = standard deviation.
