# Supplementary material for: Identification of Epstein-Barr Virus in the Human Placenta and Its Pathologic Characteristics
Source: PubMed Central journal article supplement — J Korean Med Sci. 2017 Oct 18;32(12):1959–66. doi: 10.3346/jkms.2017.32.12.1959 (PMC5680494; doi:10.3346/jkms.2017.32.12.1959), 2017-10-18
Supplement: jkms-32-1959-s002.pdf [file jkms-32-1959-s002.pdf]

**Supplementary Table 2.** Nuclear features of EBV-positive cells compared with those of EBV-negative cells from EBV-infected or uninfected placental tissues

| Nuclear features                      | 1. EBV(+) (n = 51) | 2. EBV(-) (n = 128)<br>(EBV-infected) | 3. EBV(-) (n = 95)<br>(EBV-uninfected) | <i>P</i> value (1 vs. 2) | <i>P</i> value (1 vs. 3) |
|---------------------------------------|--------------------|---------------------------------------|----------------------------------------|--------------------------|--------------------------|
| Area, $\mu\text{m}^2$                 | 59.78 $\pm$ 28.1   | 31.55 $\pm$ 12.33                     | 30.38 $\pm$ 12.84                      | < 0.001                  | < 0.001                  |
| Compactness                           | 1.44 $\pm$ 0.48    | 2.02 $\pm$ 1.69                       | 1.88 $\pm$ 0.81                        | 0.001                    | < 0.001                  |
| Eccentricity                          | 0.81 $\pm$ 0.14    | 0.93 $\pm$ 0.05                       | 0.91 $\pm$ 0.08                        | < 0.001                  | < 0.001                  |
| Extent                                | 0.67 $\pm$ 0.11    | 0.56 $\pm$ 0.14                       | 0.58 $\pm$ 0.15                        | < 0.001                  | < 0.001                  |
| Form factor                           | 0.61 $\pm$ 0.14    | 0.52 $\pm$ 0.12                       | 0.55 $\pm$ 0.14                        | < 0.001                  | 0.009                    |
| Major axis length, $\mu\text{m}$      | 12.84 $\pm$ 5.44   | 11.29 $\pm$ 2.95                      | 10.98 $\pm$ 3.96                       | 0.058                    | 0.019                    |
| Minor axis length, $\mu\text{m}$      | 6.25 $\pm$ 1.49    | 3.74 $\pm$ 0.91                       | 3.76 $\pm$ 1.00                        | < 0.001                  | < 0.001                  |
| Maximum Feret diameter, $\mu\text{m}$ | 12.64 $\pm$ 5.11   | 10.93 $\pm$ 2.87                      | 10.65 $\pm$ 3.85                       | 0.028                    | 0.009                    |
| Minimum Feret diameter, $\mu\text{m}$ | 6.31 $\pm$ 1.53    | 3.74 $\pm$ 0.92                       | 3.70 $\pm$ 1.03                        | < 0.001                  | < 0.001                  |
| Maximum radius, $\mu\text{m}$         | 2.92 $\pm$ 0.68    | 1.82 $\pm$ 0.43                       | 1.81 $\pm$ 0.47                        | < 0.001                  | < 0.001                  |
| Mean radius, $\mu\text{m}$            | 1.17 $\pm$ 0.23    | 0.80 $\pm$ 0.16                       | 0.80 $\pm$ 0.17                        | < 0.001                  | < 0.001                  |
| Median radius, $\mu\text{m}$          | 1.07 $\pm$ 0.22    | 0.73 $\pm$ 0.15                       | 0.73 $\pm$ 0.15                        | < 0.001                  | < 0.001                  |
| Perimeter, $\mu\text{m}$              | 35.24 $\pm$ 11.55  | 27.56 $\pm$ 6.54                      | 26.87 $\pm$ 8.06                       | < 0.001                  | < 0.001                  |

Data are shown as mean  $\pm$  standard deviation.

EBV = Epstein-Barr virus.
